# Supplementary material for: Benchmarking Deep Learning Approaches for Single-Excitation Wideband MRI: Establishing the First SE-Wideband Brain Dataset
Source: Research Square preprint supplement (doi:10.21203/rs.3.rs-8024132/v1), 2025-11-24
Supplement: Supplementary file 1 [file 28d73650b4415cffda0c89c5.docx]

**Supplementary**

Supplementary Table 1 demonstrates the (a) PSNR and (b) MS-SSIM performance of deep learning-based SE-Wideband reconstruction. Consistent with the NRMSE and SSIM metrics, both PSNR and MS-SSIM evaluations further confirmed the pronounced benefit of deep learning–based restoration in the SE-Wideband setting. The raw SE-Wideband baseline (22.92 in PSNR; 0.840 in MS-SSIM) and the BM4D denoising baseline (23.15; 0.850) served as references. Across all networks, the reconstructed images showed clear quantitative improvements, with PSNR values reaching approximately 26.5 and MS-SSIM values increasing to ≈ 0.928. As observed in the NRMSE/SSIM analyses, configurations incorporating perceptual or gradient loss terms again achieved the best overall performance, while TV-related combinations consistently underperformed, showing lower PSNR and MS-SSIM due to excessive smoothing. These results reaffirm the trends observed in our loss-configuration analysis, confirming that enforcing gradient or perceptual-related losses remains the most effective strategy for mitigating Wideband blurring artifacts, whereas overly smooth priors hinder detail recovery.

| (a)PSNR | Weight | UNet | ResUNet | ResAttnUNet | DRUNet | Trans-UNet | ResDnCNN | IRCNN | Uformer(Lite) | NAFNet(Lite) |
| --- | --- | --- | --- | --- | --- | --- | --- | --- | --- | --- |
| SEWB Baseline | -- | 22.92 (±1.38) | 22.92 (±1.38) | 22.92 (±1.38) | 22.92 (±1.38) | 22.92 (±1.38) | 22.92 (±1.38) | 22.92 (±1.38) | 22.92 (±1.38) | 22.92 (±1.38) |
| BM4D Baseline | -- | 23.15 (±1.41) | 23.15 (±1.41) | 23.15 (±1.41) | 23.15 (±1.41) | 23.15 (±1.41) | 23.15 (±1.41) | 23.15 (±1.41) | 23.15 (±1.41) | 23.15 (±1.41) |
| L1 | [1.0] | 25.95 (±1.95) | 26.19 (±1.96) | 25.73 (±1.93) | 26.27 (±1.84) | 26.11 (±1.95) | 26.39 (±1.93) | 26.25 (±1.89) | 25.84 (±1.51) | 25.63 (±1.78) |
| L1+SSIM | [0.7, 0.3] | 25.42 (±2.24) | 25.15 (±2.21) | 25.13 (±2.04) | 26.08 (±2.12) | 25.25 (±2.26) | 26.04 (±2.22) | 25.98 (±2.19) | 25.96 (±1.54) | 25.70 (±1.87) |
| L1+MS-SSIM | [0.7, 0.3] | 25.80 (±2.04) | 25.98 (±2.06) | 25.49 (±2.07) | 26.20 (±2.02) | 25.83 (±2.12) | 26.16 (±1.93) | 26.14 (±1.98) | 25.49 (±1.63) | 26.17 (±1.79) |
| L1 + Total Variation | [0.7, 0.3] | 23.96 (±1.28) | 23.70 (±1.67) | 23.67 (±1.46) | 23.60 (±1.50) | 24.05 (±1.32) | 23.90 (±1.72) | 23.69 (±1.78) | 24.80 (±1.57) | 24.07 (±1.23) |
| L1 + Perceptual | [0.7, 0.3] | 26.05 (±1.85) | 25.98 (±2.00) | 25.86 (±1.97) | 26.16 (±1.86) | 26.13 (±1.97) | 26.29 (±1.88) | 26.24 (±1.90) | 26.01 (±1.54) | 25.53 (±1.68) |
| L1 + Gradient | [0.7, 0.3] | 26.28 (±1.83) | 26.29 (±1.89) | 26.10 (±1.96) | 26.47 (±1.75) | 26.15 (±1.85) | 26.49 (±1.84) | 26.45 (±1.95) | 25.76 (±1.51) | 25.74 (±1.74) |
| L1 + SSIM + TV | [0.4, 0.3, 0.3] | 24.87 (±1.99) | 24.91 (±1.94) | 24.43 (±1.68) | 25.68 (±1.88) | 24.39 (±1.84) | 25.44 (±1.76) | 25.75 (±1.85) | 26.00 (±1.46) | 24.68 (±1.72) |
| L1 + SSIM + Percept. | [0.4, 0.3, 0.3] | 25.48 (±2.28) | 25.48 (±2.17) | 25.04 (±2.10) | 25.89 (±2.20) | 24.95 (±2.06) | 26.03 (±2.11) | 26.07 (±2.13) | 25.99 (±1.50) | 26.26 (±1.80) |
| L1 + SSIM + Grad. | [0.4, 0.3, 0.3] | 25.43 (±2.25) | 25.54 (±2.18) | 25.33 (±2.00) | 25.91 (±2.16) | 25.31 (±2.07) | 26.12 (±2.14) | 26.02 (±2.07) | 25.99 (±1.51) | 26.07 (±1.93) |
| L1 + MS-SSIM+TV | [0.4, 0.3, 0.3] | 24.46 (±1.48) | 24.91 (±1.53) | 24.06 (±1.39) | 25.31 (±1.84) | 24.55 (±1.50) | 25.38 (±1.66) | 25.42 (±1.51) | 24.90 (±1.44) | 24.08 (±1.29) |
| L1 + MS-SSIM + Percept. | [0.4, 0.3, 0.3] | 25.77 (±2.06) | 25.65 (±2.19) | 25.17 (±2.11) | 25.52 (±2.08) | 26.06 (±2.10) | 26.24 (±1.89) | 26.24 (±1.93) | 25.79 (±1.55) | 25.74 (±2.10) |
| L1 + MS-SSIM + Grad. | [0.4, 0.3, 0.3] | 26.00 (±1.97) | 25.99 (±2.14) | 25.72 (±2.12) | 26.22 (±2.09) | 25.88 (±1.99) | 25.99 (±1.86) | 26.25 (±1.94) | 25.60 (±1.54) | 26.02 (±1.82) |
| L1 + TV + Percept. | [0.4, 0.3, 0.3] | 24.91 (±1.42) | 25.43 (±1.53) | 24.61 (±1.50) | 25.44 (±1.42) | 25.04 (±1.54) | 25.63 (±1.49) | 25.63 (±1.54) | 25.99 (±1.45) | 24.68 (±1.47) |
| L1 + TV + Grad. | [0.4, 0.3, 0.3] | 24.59 (±1.24) | 24.92 (±1.38) | 24.33 (±1.30) | 24.41 (±1.39) | 24.67 (±1.30) | 24.94 (±1.53) | 24.77 (±1.57) | 25.24 (±1.42) | 24.45 (±1.29) |
| L1 + Percept. + Grad. | [0.4, 0.3, 0.3] | 26.06 (±1.85) | 26.04 (±2.06) | 26.11 (±1.95) | 26.33 (±1.81) | 25.97 (±1.95) | 26.35 (±1.83) | 26.30 (±1.89) | 25.94 (±1.50) | 25.92 (±1.75) |
| (b) MS-SSIM | Weight | Unet | ResUNet | ResAttnUNet | DRUNet | Trans-UNet | ResDnCNN | IRCNN | Uformer(Lite) | NAFNet(Lite) |
| SEWB Baseline | -- | 0.840 (±0.048) | 0.840 (±0.048) | 0.840 (±0.048) | 0.840 (±0.048) | 0.840 (±0.048) | 0.840 (±0.048) | 0.840 (±0.048) | 0.840 (±0.048) | 0.840 (±0.048) |
| BM4D Baseline | -- | 0.850 (±0.047) | 0.850 (±0.047) | 0.850 (±0.047) | 0.850 (±0.047) | 0.850 (±0.047) | 0.850 (±0.047) | 0.850 (±0.047) | 0.850 (±0.047) | 0.850 (±0.047) |
| L1 | [1.0] | 0.926 (±0.029) | 0.928 (±0.030) | 0.925 (±0.029) | 0.928 (±0.029) | 0.927 (±0.030) | 0.926 (±0.036) | 0.924 (±0.035) | 0.919 (±0.027) | 0.925 (±0.028) |
| L1+SSIM | [0.7, 0.3] | 0.921 (±0.034) | 0.920 (±0.035) | 0.921 (±0.033) | 0.926 (±0.032) | 0.921 (±0.035) | 0.924 (±0.038) | 0.924 (±0.035) | 0.918 (±0.030) | 0.926 (±0.029) |
| L1+MS-SSIM | [0.7, 0.3] | 0.922 (±0.031) | 0.922 (±0.033) | 0.919 (±0.034) | 0.926 (±0.031) | 0.921 (±0.034) | 0.926 (±0.031) | 0.925 (±0.032) | 0.920 (±0.027) | 0.925 (±0.030) |
| L1 + Total Variation | [0.7, 0.3] | 0.903 (±0.026) | 0.903 (±0.028) | 0.899 (±0.029) | 0.899 (±0.030) | 0.906 (±0.028) | 0.904 (±0.030) | 0.904 (±0.035) | 0.906 (±0.030) | 0.905 (±0.028) |
| L1 + Perceptual | [0.7, 0.3] | 0.926 (±0.029) | 0.927 (±0.030) | 0.926 (±0.030) | 0.927 (±0.029) | 0.926 (±0.030) | 0.926 (±0.030) | 0.926 (±0.030) | 0.921 (±0.027) | 0.925 (±0.028) |
| L1 + Gradient | [0.7, 0.3] | 0.928 (±0.028) | 0.928 (±0.030) | 0.926 (±0.031) | 0.928 (±0.029) | 0.925 (±0.030) | 0.926 (±0.030) | 0.926 (±0.030) | 0.919 (±0.027) | 0.925 (±0.029) |
| L1 + SSIM + TV | [0.4, 0.3, 0.3] | 0.917 (±0.032) | 0.920 (±0.031) | 0.916 (±0.031) | 0.925 (±0.029) | 0.919 (±0.031) | 0.920 (±0.030) | 0.923 (±0.030) | 0.921 (±0.028) | 0.919 (±0.030) |
| L1 + SSIM + Percept. | [0.4, 0.3, 0.3] | 0.920 (±0.036) | 0.924 (±0.033) | 0.922 (±0.034) | 0.925 (±0.033) | 0.921 (±0.033) | 0.924 (±0.035) | 0.925 (±0.033) | 0.921 (±0.028) | 0.928 (±0.029) |
| L1 + SSIM + Grad. | [0.4, 0.3, 0.3] | 0.920 (±0.034) | 0.921 (±0.034) | 0.922 (±0.033) | 0.925 (±0.033) | 0.922 (±0.033) | 0.925 (±0.033) | 0.925 (±0.033) | 0.920 (±0.028) | 0.926 (±0.030) |
| L1 + MS-SSIM+TV | [0.4, 0.3, 0.3] | 0.909 (±0.027) | 0.915 (±0.028) | 0.907 (±0.029) | 0.920 (±0.029) | 0.910 (±0.029) | 0.921 (±0.028) | 0.920 (±0.028) | 0.914 (±0.027) | 0.909 (±0.027) |
| L1 + MS-SSIM + Percept. | [0.4, 0.3, 0.3] | 0.921 (±0.033) | 0.920 (±0.035) | 0.919 (±0.034) | 0.922 (±0.031) | 0.923 (±0.032) | 0.926 (±0.030) | 0.925 (±0.032) | 0.920 (±0.027) | 0.925 (±0.031) |
| L1 + MS-SSIM + Grad. | [0.4, 0.3, 0.3] | 0.922 (±0.033) | 0.921 (±0.035) | 0.921 (±0.034) | 0.926 (±0.031) | 0.922 (±0.032) | 0.925 (±0.031) | 0.925 (±0.032) | 0.919 (±0.027) | 0.925 (±0.029) |
| L1 + TV + Percept. | [0.4, 0.3, 0.3] | 0.918 (±0.026) | 0.923 (±0.027) | 0.914 (±0.029) | 0.920 (±0.028) | 0.923 (±0.025) | 0.921 (±0.028) | 0.920 (±0.031) | 0.921 (±0.027) | 0.918 (±0.028) |
| L1 + TV + Grad. | [0.4, 0.3, 0.3] | 0.912 (±0.025) | 0.915 (±0.026) | 0.909 (±0.027) | 0.907 (±0.029) | 0.915 (±0.026) | 0.913 (±0.029) | 0.911 (±0.030) | 0.911 (±0.028) | 0.911 (±0.027) |
| L1 + Percept. + Grad. | [0.4, 0.3, 0.3] | 0.926 (±0.029) | 0.925 (±0.032) | 0.927 (±0.030) | 0.927 (±0.029) | 0.925 (±0.030) | 0.926 (±0.030) | 0.926 (±0.031) | 0.921 (±0.027) | 0.926 (±0.028) |

Supplementary Table 1. (a) PSNR and (b) MS-SSIM performance of SE-Wideband reconstructions across different networks and loss combinations. Values for the top three performing loss combinations for each network are highlighted in red, while the three lowest-performing configurations are in blue.
